# Supplementary material for: Recent advances in the synthesis of imidazoles
Source: Royal Society of Chemistry journal article supplement (doi:10.1039/d0ob00350f), 2020-01-01
Supplement: d0ob00350f1.xlsx [file d0ob00350f1.xlsx]

## Sheet: Sheet1
Entry	Bonds	NH	NR	C2	C4	C5	Author	Yields, %	Ref.
1	one	✓		✓	✓		Fang	13 - 90	19
2	two	✓		✓	✓	✓	Shi	32 - 87	20
3	two	✓		✓	✓	✓	Man	42 - 97	21
4	two	✓		✓	✓	✓	Tang	43 - 81	22
5	two	✓		✓	✓	✓	Harisha	70 - 85	23
6	two		✓	✓	✓		Yang	32 - 99	24
7	two		✓		✓	✓	Cai	47 - 93	25
8	two	✓		✓	✓	✓	Nikolaenkova	28 - 58	26
9	two		✓	✓	✓	✓	Strelnikova	65 - 98	27
10	two	✓		✓	✓	✓	Wu	67 - 96	28
11	two		✓	✓	✓	✓	Tian	75 - 95	29
12	two		✓	✓	✓		Tian	45 - 91	30
13	two		✓	✓		✓	Wang	62 - 82	31
14	two	✓		✓	✓		Shabalin	6 - 25	32
15	two		✓	✓		✓	Li	62 - 82	33
16	three		✓	✓	✓	✓	Pardeshi	45 - 80	34
17	three		✓	✓	✓		Salfeena	13 - 64	35
18	three		✓		✓		Geng	52 - 76	36
19	three		✓	✓	✓		Alanthadka	42 - 89	38
20	three		✓	✓	✓	✓	Chen	20 - 90	39
21	three		✓	✓	✓	✓	Alizadeh-Bami	65 -87	40
22	three	✓		✓	✓	✓	Wang	49 - 93	41
23	four	✓		✓	✓	✓	Sundar	65 -95	42
24	four	✓		✓	✓	✓	Higuera	75 - 100	43
25	four		✓	✓	✓	✓	Marzouk	86 - 96	44
26	four		✓	✓	✓	✓	Thwin	92 - 98	45
27	four		✓	✓	✓	✓	Vaid	80 - 95	46
28	four	✓		✓	✓	✓	Varzi	51 - 95	47
29	four		✓	✓	✓	✓	Arafa	95 - 99	49
30	four	✓		✓	✓	✓	Sonar	83 - 94	50
31	four	✓		✓	✓		Toledo	23 - 85	51
32	four	✓		✓	✓	✓	Maleki	75 - 96	53
33	four	✓		✓	✓	✓	Rajabzadeh	75 - 95	54
34	four	✓		✓	✓	✓	Ahooie	70 - 95	55
35	four		✓	✓	✓	✓	Aghahosseini	60 - 99	56
36	four		✓	✓	✓	✓	Gilan	65 - 92	57
37	four		✓	✓	✓	✓	Hosseini	75 - 95	58
38	four	✓			✓		Ruan	41 - 84	59
39	four	✓		✓	✓	✓	Dubovtsev	72 - 90	60
40	four		✓	✓	✓	✓	Sun	72 - 88	61
41	four	✓		✓	✓	✓	Naidoo	18 - 95	62
